# Supplementary material for: Effectiveness of Maternal Influenza Immunization in Mothers and Infants
Source: Atypon-hosted journal article supplement (doi:10.1056/nejmoa0708630), 2008-09-17
Supplement: nejm_zaman_1555sa1.pdf [file nejm_zaman_1555sa1.pdf]

## Supplementary Appendix

This appendix has been provided by the authors to give readers additional information about their work.

Supplement to: Zaman K, Roy E, Arifeen SE, et al. Effectiveness of maternal influenza immunization in mothers and infants. *N Engl J Med* 2008;359:1555-64. DOI: 10.1056/NEJMoa0708630.

Definitions of influenza illness in infants:

Laboratory-confirmed influenza illness was an acute respiratory illness more than 7 days after a previous respiratory illness, with a positive rapid test for influenza virus.

Standard influenza-like illness (ILI) definitions (19) were modified for the young infants; we defined infant respiratory illness with fever (RIF) as a maternal report of infant illness, occurring more than 7 days after previous illness, with respiratory symptoms including runny nose, nasal congestion, cough, difficulty swallowing or difficulty breathing with fever;

RIF  $>38^{\circ}\text{C}$  was RIF with an axillary temperature  $>38^{\circ}\text{C}$  documented with a digital thermometer, and

Clinic visit was a visit to the study clinic with a respiratory illness.

Diarrheal illness was defined as maternal report of increased stool frequency with change in stool character.

Sample Size:

The sample size of the study was calculated to answer the primary study question: to detect a specified difference between infant study groups of the geometric mean IgG antibody titers for selected pneumococcal polysaccharides. Using standard formulae, and reported local antibody variance data (27), setting 2-sided  $\alpha = 0.05$ , and  $\beta = 0.20$  and assuming 25% of enrolled subjects might not complete the study, 336 subjects were needed for the primary pneumococcal vaccine immunogenicity study. This

study size was also sufficient to detect a 30% or greater difference in illness rates between the two groups of children in the influenza vaccine effectiveness assessment.

Analysis:

The natural logarithm of person-months of observation in each study group was used as the offset term in the regression models. For estimation of effectiveness against the primary outcome of laboratory-proven influenza in infants, the first laboratory test-positive event in an infant and the person-time of observation up to that episode were included in the analysis. For all other outcomes in mothers and infants, multiple events were included in the analysis and were assumed to be auto-correlated within each study subject (infant or mother) and independent between subjects. Therefore, the confidence intervals for outcomes with multiple events were based on robust (Huber/White/sandwich) estimation of variance.

**Appendix Table 1. Screening and Enrollment Data**

|                                                     | <b>number</b> | <b>%</b> |
|-----------------------------------------------------|---------------|----------|
| Subjects screened                                   | 823           | 100.0%   |
| Subjects enrolled                                   | 340           | 41.3%    |
| Subjects not enrolled                               | 483           | 58.7%    |
| <b><u>Reasons for not enrolling</u></b>             |               |          |
| Declined, not interested                            | 166           | 34.4%    |
| Refusal                                             | 106           | 21.9%    |
| Not planning to stay in Dhaka for/after delivery    | 77            | 15.9%    |
| Obstetric high risk group                           | 68            | 14.1%    |
| Did not return to clinic after initial discussion   | 26            | 5.4%     |
| History of Allergy                                  | 17            | 3.5%     |
| Mismatch between clinical examination and LMP dates | 17            | 3.5%     |
| Medical contraindication                            | 6             | 1.2%     |
| Subtotal                                            | 483           |          |

**Appendix Table 2. Reactions in mothers (0-7 days after immunization**

|                                           | <b><u>vaccine</u></b>   |                            |                       |
|-------------------------------------------|-------------------------|----------------------------|-----------------------|
|                                           | <b><u>influenza</u></b> | <b><u>pneumococcal</u></b> |                       |
|                                           | <b><u>(n=172)</u></b>   | <b><u>(n=168)</u></b>      | <b><u>p-value</u></b> |
| <b>minor local and systemic reactions</b> | 13 (7.6%)               | 20 (12.0%)                 | 0.17                  |
| <b>local pain</b>                         | 7 (4.1%)                | 19 (11.4%)                 | 0.01                  |
| <b>fewer within 72 hours</b>              | 23 (13.4%)              | 21 (12.6%)                 | 0.81                  |

**Appendix Table 3. Adverse Events**

| <b>Deaths</b>          |                |                                                  |               |                 |
|------------------------|----------------|--------------------------------------------------|---------------|-----------------|
| <b>age group</b>       | <b>vaccine</b> | <b>cause</b>                                     | <b>number</b> | <b>related*</b> |
| <b>fetal</b>           |                |                                                  |               |                 |
|                        | influenza      | stillbirth                                       | 3             | no              |
| <b>perinatal</b>       |                |                                                  |               |                 |
|                        | pneumococcal   | severe perinatal asphyxia                        | 2             | no              |
|                        | influenza      | preterm low birth weight, and Rh incompatibility | 1             | no              |
| <b>mother</b>          |                |                                                  |               |                 |
|                        | pneumococcal   | anesthesia complications                         | 1             | no              |
| <b>Hospitalization</b> |                |                                                  |               |                 |
| <b>mother</b>          |                |                                                  |               |                 |
| <b>peri partum</b>     | pneumococcal   | hypertension                                     | 1             | no              |
|                        | influenza      | fever                                            | 1             | no              |
|                        | influenza      | reduced fetal activity                           | 1             | no              |
|                        | influenza      | antenatal complications                          | 1             | no              |
|                        | pneumococcal   | abdominal pain, diarrhea                         | 1             | no              |
| <b>newborn</b>         |                |                                                  |               |                 |
| <b>0-28 days</b>       | pneumococcal   | transient tachypnea                              | 2             | no              |
|                        | pneumococcal   | meconium aspiration                              | 1             | no              |
|                        | influenza      | low birth weight                                 | 1             | no              |
|                        | pneumococcal   | low birth weight                                 | 2             | no              |
|                        | pneumococcal   | jaundice                                         | 1             | no              |
|                        | influenza      | asphyxia                                         | 4             | no              |
|                        | pneumococcal   | asphyxia                                         | 5             | no              |
| <b>infants</b>         |                |                                                  |               |                 |
| <b>5-24 weeks</b>      | pneumococcal   | gastroenteritis                                  | 3             | no              |
|                        | influenza      | gastroenteritis                                  | 3             | no              |
|                        | pneumococcal   | pneumonia                                        | 3             | no              |
|                        | influenza      | pneumonia                                        | 2             | no              |
|                        | influenza      | septicemia                                       | 4             | no              |
|                        | pneumococcal   | septicemia                                       | 1             | no              |
|                        | influenza      | meningitis                                       | 1             | no              |
|                        | pneumococcal   | meningitis                                       | 1             | no              |
| <b>mother</b>          |                |                                                  |               |                 |
| <b>post partum</b>     | influenza      | appendicitis                                     | 1             | no              |

\*to vaccine or to participation in study, as determined by DSMB

a) There were no statistical differences in the numbers of death or hospitalizations between the 2 vaccine groups. These observed rates of maternal, neonatal and infant mortality are not significantly different from national Bangladesh rates. ([http://www.who.int/whr/2005/annex/annexe8\\_en.pdf](http://www.who.int/whr/2005/annex/annexe8_en.pdf))
